# Supplementary material for: Temperature non-uniformity detection on dPCR chips and temperature sensor calibration
Source: Royal Society of Chemistry journal article supplement (doi:10.1039/d1ra08138a), 2022-01-01
Supplement: d1ra08138a1.pdf [file d1ra08138a1.pdf]

# Temperature non-uniformity detection on dPCR chips and temperature sensor calibration (Supplementary data)

Martina Gaňová<sup>a\*</sup>, Xinlu Wang<sup>b\*</sup>, Zhiqiang Yan<sup>c</sup>, Haoqing Zhang<sup>b</sup>, Tomáš Lednický<sup>a</sup>, Marie Korabečná<sup>d</sup> and Pavel Nežil<sup>b</sup>

<sup>a</sup>Central European Institute of Technology, Brno University of Technology, Purkyňova 123, 612 00 Brno, Czech Republic.

<sup>b</sup>Northwestern Polytechnical University, School of Mechanical Engineering, Department of Microsystem Engineering, 127 West Youyi Road, Xi'an, Shaanxi, 710072, PR China.

<sup>c</sup>Northwestern Polytechnical University, School of Marine Science and Technology, 127 West Youyi Road, Xi'an, Shaanxi, 710072, PR China.

<sup>d</sup>Institute of Biology and Medical Genetics, First Faculty of Medicine, Charles University and General University Hospital in Prague, Albertov 4, 128 00 Prague, Czech Republic.

## Supplementary Section A: The melting curves and its derivative after amplification from a commercial PCR thermal cycler

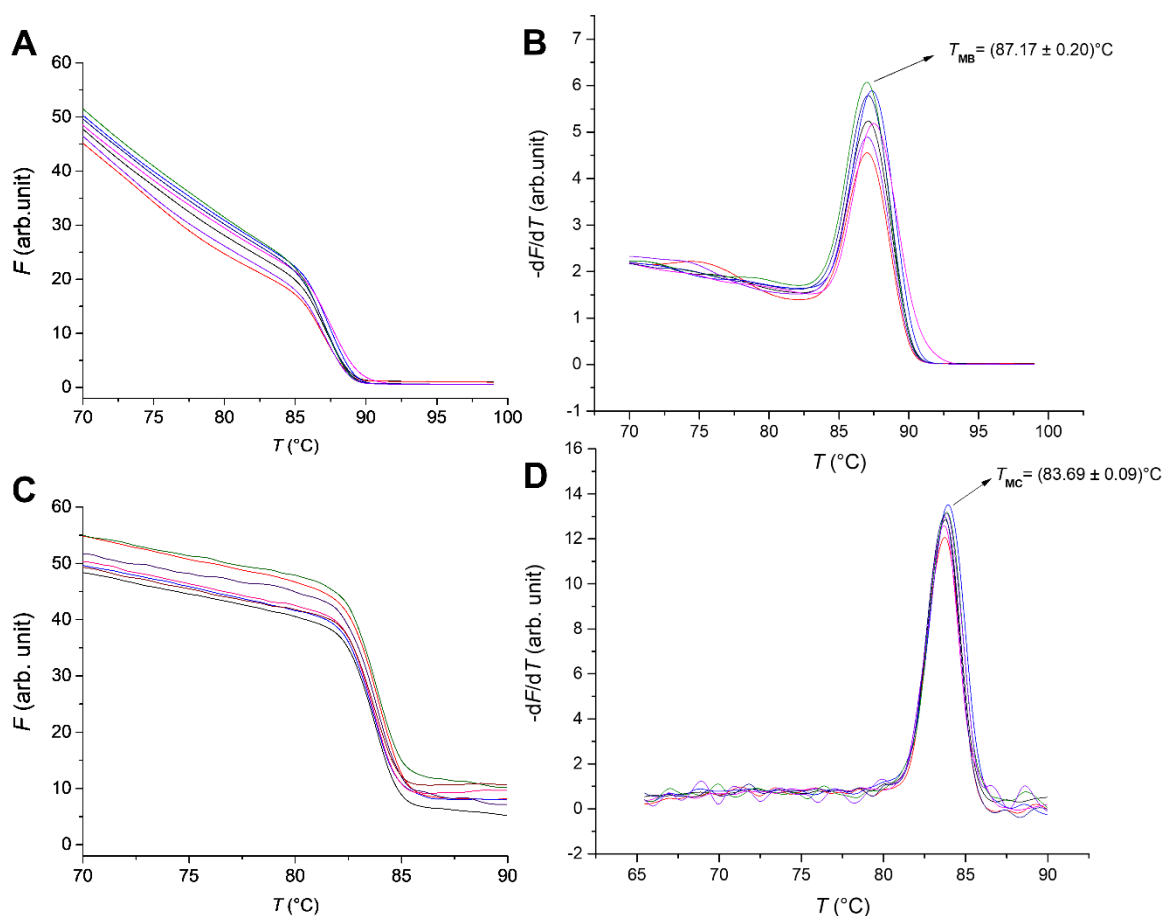

Figure S1: The qPCR MCA measurements. (A) Seven melting curves of HBV gene and (B) its  $-dF/dT$  with mean value of  $T_{MB}$ . (C) Seven melting curves of Chr21 gene and (D) its  $-dF/dT$  with mean value of  $T_{MC}$ .

Supplementary Section B: A **fluorescent** images of dPCR chip

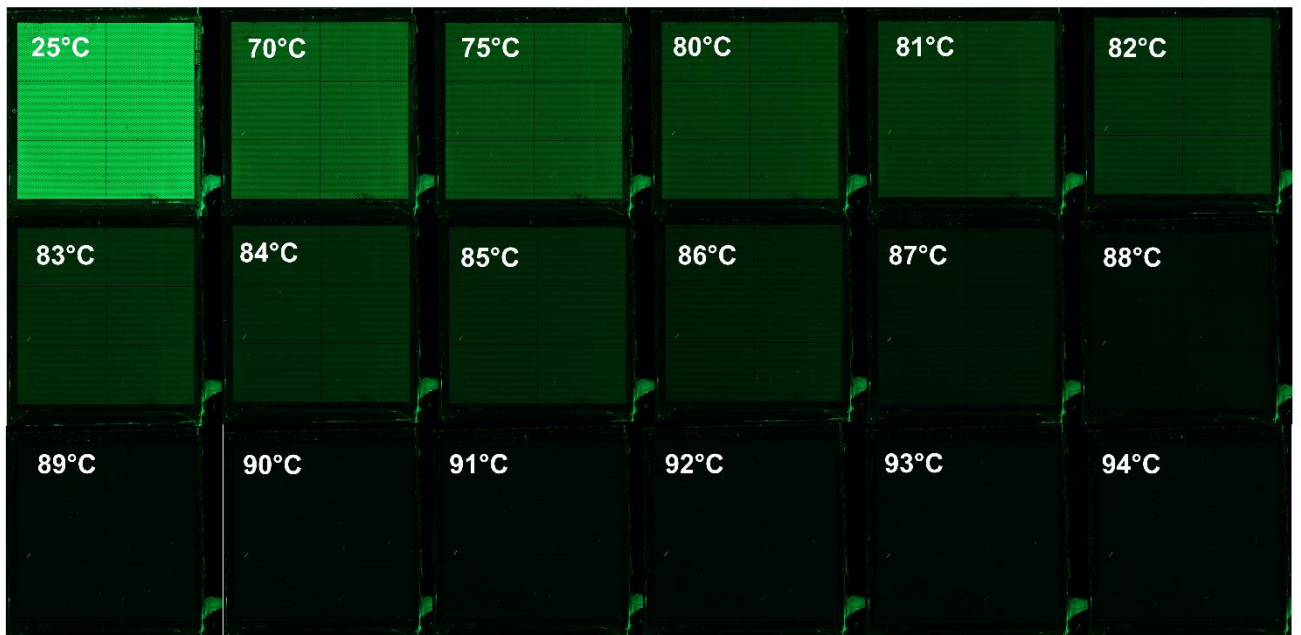

*Figure S2: The fluorescence images of dPCR chip in the  $T_s$  range from 25°C to 94°C loaded with the PCR amplicons of HBV target gene covered with mineral oil and a cover glass.*

## Supplementary Section C MATLAB codes

### *Analysis.m*

```
%% Read image.
```

```
clear;clc;close all;warning off;
```

```
%%
```

```
% load centers_final;
```

```
img=imread('25.JPG');
```

```
img_double=double(rgb2gray(img))./255;
```

```
figure;imshow(img_double);hold on;
```

```
leftup=[1435,648];rightup=[3398,733];
```

```
leftdown=[1353,2595];rightdown=[3314,2679];
```

```
Coor_Real=StandardChip(0,47.6314,1);
```

```
Lenx=max(Coor_Real(:,1))/2;
```

```
Leny=max(Coor_Real(:,2))/2;
```

```
Coor_Real=Coor_Real-[Lenx,Leny];
```

```
hold on;
```

```
basepoints=[leftup;rightup;leftdown;rightdown];
```

```
inputpoints=[-Lenx,-Leny;Lenx,-Leny;-Lenx,Leny;Lenx,Leny];
```

```
tform=fitgeotrans(basepoints,inputpoints,'projective');
```

```
centers_final=zeros(26448,2);
```

```
for i=1:1:26448
```

```
    Coor_Grid=Coor_Real(i,:);
```

```
    centers_final(i,:)=transformPointsInverse(tform,Coor_Grid);
```

```
end
```

```

scatter(centers_final(:,1),centers_final(:,2),5,'g','filled');
save centers_final centers_final

%%

% load results;
Temp=["25","70","75","80","81","82","83","84","85","86","87","88","89","90","91",
"92","93","94"];
len=numel(Temp);
load centers_final;
Fluo=zeros(26448,len);
centers_round=round(centers_final);
Rad=1;
model_orig=getnhood(strel('disk',Rad));
model_orig=double(model_orig);
for i=1:1:len
    str_temp=char(strcat(Temp(i),'.JPG'));
    img=imread(str_temp);
    img_final=double(rgb2gray(img))./255;
    figure;imshow(img_final); hold on;
    scatter(centers_round(:,1),centers_round(:,2),5,'r','filled');title('Detected circles');
    for j=1:1:26448
        cir_temp=img_final(centers_round(j,2)-
Rad:centers_round(j,2)+Rad,centers_round(j,1)-Rad:centers_round(j,1)+Rad);
        cir_temp=cir_temp.*model_orig;
        Fluo(j,i)=mean(mean(cir_temp));
    end
end
Fluo=Fluo';
Temp=(str2double(Temp));

```

```

load chirp
save results Fluo Temp
sound(y,Fs)
%%
img=imread('25.JPG');
img_final=double(rgb2gray(img))/255;
img_show=cat(3,img_final,img_final,img_final);

Fluo_diff=-diff(Fluo);
filter1=Fluo_diff(1,:)>0;

Jud=Fluo_diff<0;
filter2=sum(Jud(1:end-1,:))<3;

filter=filter1&filter2;
index_fill=find(filter);
num_fill=numel(index_fill);
%%
Fluo_filtered=Fluo(:,index_fill);
xi=60:0.1:90;
Temp_melt_ind=zeros(num_fill,1);
yi_all=zeros(numel(xi),num_fill);yi_diff_all=zeros(numel(xi)-1,num_fill);
wa=waitbar(0,'Please wait....');
for i=1:1:num_fill
    yi=interp1(Temp,Fluo_filtered(:,i),xi,'PCHIP');
    yi_diff=-diff(yi);

    yi_all(:,i)=yi';

```

```

yi_diff_all(:,i)=yi_diff;

[~,Temp_melt_ind(i)]=max(yi_diff);
waitbar(i/num_fill);
end
close(wa);
Temp_melt=xi(Temp_melt_ind);
% figure;plot(xi,yi_all);title('Fluo as function of temperature');
% figure;plot(xi(2:end),yi_diff_all);title('dF/dT as function of temperature');
axis([65,90,0,inf]);
figure;histogram(Temp_melt);
%%
rad=5;
model_orig=getnhood(strel('disk',rad));
model_orig=double(model_orig);
centers_round=round(centers_final);
col=jet(255);
for k=1:1:num_fill
    col_temp=round((Temp_melt(k)-80)/15*255);
    %col_temp=round((Temp_melt(k)-64)/20*255);
    try
        img_show_temp=img_show(centers_round(index_fill(k),2)-(rad-1):centers_round(index_fill(k),2)+(rad-1),...
            centers_round(index_fill(k),1)-(rad-1):centers_round(index_fill(k),1)+(rad-1),:));
        img_show(centers_round(index_fill(k),2)-(rad-1):centers_round(index_fill(k),2)+(rad-1),...
            centers_round(index_fill(k),1)-(rad-1):centers_round(index_fill(k),1)+(rad-1),:))=...

```

```
cat(3,model_orig.*col(col_temp,1),model_orig.*col(col_temp,2),model_orig.*col(c
ol_temp,3))+cat(3,~model_orig,~model_orig,~model_orig).*img_show_temp;

    catch

    end

end

figure;imshow(img_show);title('Distribution of melting Temperature');
%colorbar('Ticks',[0,0.25,0.5,0.75,1],...

%'TickLabels',{'70','75','80','85','90'});
colorbar('Ticks',[0,0.2,0.4,0.6,0.8,1],...
    'TickLabels',{'80','83','86','89','92','95'});
gcf
saveas(gcf,'result.png');
imwrite(img_show,'result.tif');
Show3DMap(Temp_melt,index_fill)
```

*Show3DMap.m*

```
function [Map_fit_show] = Show3DMap(Matrix_new,Ind)
% UNTITLED7 'Ë'ïÏÔÊ¾ÓÐ¹Ø 'Ë°-ÊýµÄÕªÒª
% 'Ë'ïÏÔÊ¾ÏËÏ,ËµÃ÷
Coor_Real=StandardChip(0,47.6314,1);
Lenx=max(Coor_Real(:,1))/2;
Leny=max(Coor_Real(:,2))/2;
Coor_Real=Coor_Real-[Lenx,Leny];
Lenx_ex=Lenx+25;Leny_ex=Leny+25;
len1=1000;x_grid=linspace(-Lenx_ex,Lenx_ex,len1);
len2=1000;y_grid=linspace(-Leny_ex,Leny_ex,len2);
[X,Y]=meshgrid(x_grid,y_grid);
%%
Map_interp=scatteredInterpolant(Coor_Real(Ind,:),Matrix_new,'linear','linear');
% Map_interp=scatteredInterpolant(Coor_Real(Ind,:),Matrix_new(Ind,:),'linear','linear');
ft=fittype('poly22');
Map_fit=fit(Coor_Real(Ind,:),Matrix_new,ft,'Normalize','on');
% Map_fit=fit(Coor_Real(Ind,:),Matrix_new(Ind,:),ft,'Normalize','on');

Map_interp_show=zeros(len1,len2);
Map_fit_show=zeros(len1,len2);

wait=waitbar(0,'Constructing 3D Map, Please wait for seconds..');
for i=1:1:len1
    for j=1:1:len2
        Map_interp_show(i,j)=Map_interp(x_grid(i),y_grid(j));
        Map_fit_show(i,j)=Map_fit(x_grid(i),y_grid(j));
```



```

end
waitbar(i/len1);
end
close(wait);
Map_interp_show=imgaussfilt(Map_interp_show,30);
%%
figure;
% subplot(1,2,1);
s1=surf(X,Y,Map_interp_show);s1.LineStyle='none';
title('3D distribution Map of Tm');
xlabel('X-axis Uint:um');
ylabel('Y-axis Uint:um');
zlabel('Melting temperature (Tm)');
% axis([-Lenx_ex Lenx_ex -Leny_ex Leny_ex 0.5 1.5]);
%%
figure;
% subplot(1,2,2)
s2=surf(X,Y,Map_fit_show);s2.LineStyle='none';
title('Fitted 3D-Map');
xlabel('X-axis Uint:um');
ylabel('Y-axis Uint:um');
zlabel('Melting temperature (Tm)');
% axis([-Lenx_ex Lenx_ex -Leny_ex Leny_ex 0.5 1.5]);

end

```

*StandardChip.m*

```
function [Coor] = StandardChip( x,y,bili)
ori1=[];
ori2=[];
for i=0:1:75
    for j=0:1:28
        temp=[55*i,95.262794*j];
        ori1=[ori1;temp];
    end
end
ori2(:,1)=ori1(:,1)+27.5;
ori2(:,2)=ori1(:,2)-47.6314;
deltax=4205;
deltay=2792;
OneBlock=[ori1;ori2];

Coor1=OneBlock+([deltax*0;deltay*0]*ones(1,4408))';
Coor2=OneBlock+([deltax*0;deltay*1]*ones(1,4408))';
Coor3=OneBlock+([deltax*0;deltay*2]*ones(1,4408))';
Coor4=OneBlock+([deltax*1;deltay*0]*ones(1,4408))';
Coor5=OneBlock+([deltax*1;deltay*1]*ones(1,4408))';
Coor6=OneBlock+([deltax*1;deltay*2]*ones(1,4408))';
Coor=[Coor1;Coor2;Coor3;Coor4;Coor5;Coor6]./bili;
Coor=Coor+[x,y];

end
```

Supplementary Section D: The melting curves and its derivative extracted from five partitions of the dPCR chip

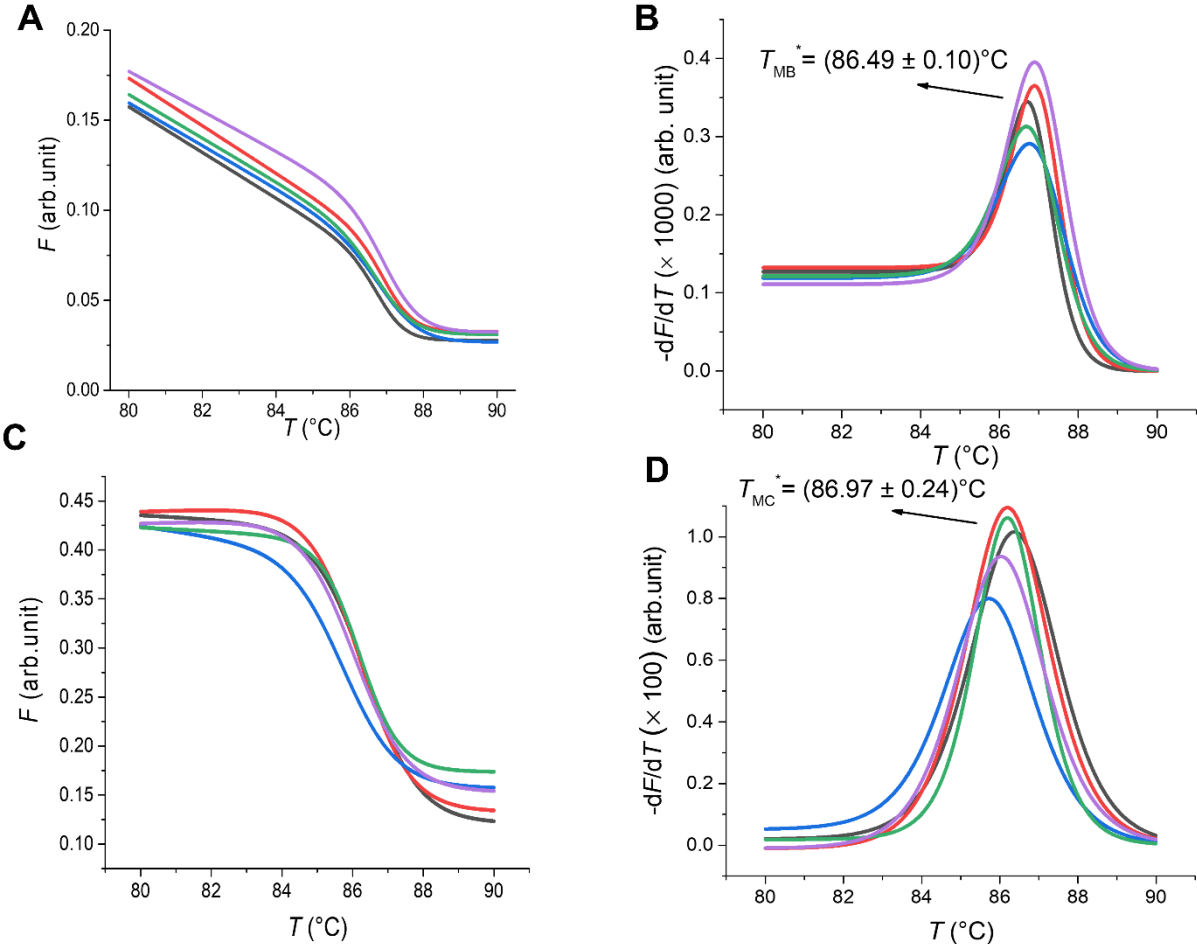

Figure S3: MCA data from five partitions of a dPCR chip filled with (A) HBV target gene and (B)  $-dF/dT$  as function of  $T$  and its mean values of  $T_{MB}^*$ , (C) Chr21 target gene and (D)  $-dF/dT$  as function of  $T$  and its mean values of  $T_{MC}^*$ .

Supplementary Section D: 2D distribution map of  $T_M^*$

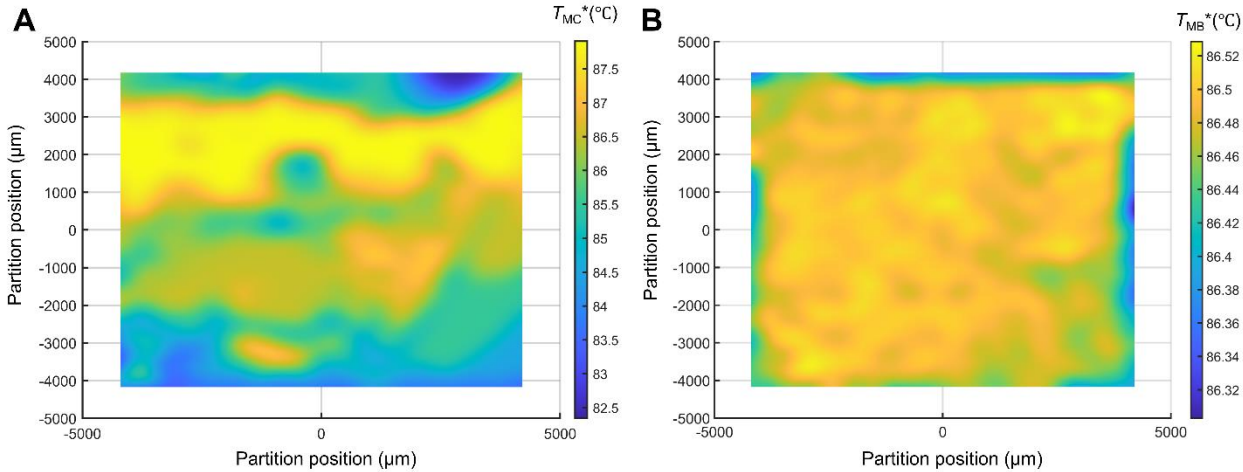

Figure S4: 2D distribution map of (A)  $T_{MC}^*$  measured by setup A and (B)  $T_{MB}^*$  measured by setup B for better visualization of temperature distribution across the dPCR chip area.
